# Supplementary material
Source: Springer Nature journal article supplement (https://www.springermedizin.de/resource/supplementary/13033_2012_136_MOESM1_ESM.pdf/9651882)
Supplement: MOESM1 [file 9651882]

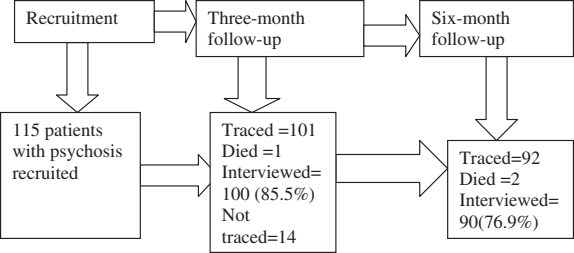

Recruitment

Three-month  
follow-up

Six-month  
follow-up

115 patients  
with psychosis  
recruited

Traced = 101  
Died = 1  
Interviewed =  
100 (85.5%)  
Not  
traced = 14

Traced = 92  
Died = 2  
Interviewed =  
90 (76.9%)
